# Supplementary material for: Mothers with Cancer: An Intersectional Mixed-Methods Study Investigating Role Demands and Perceived Coping Abilities
Source: MDPI journal article supplement (doi:10.3390/cancers15061915), 2023-03-22
Supplement: s1 [file s1]

**Supplement Table S1.** Semi-structured interview guide based on study aims.

| Study aim                                                                                                       | Guiding interview questions                                                                                                                                                                                                                                                                                                                                                                              |
|-----------------------------------------------------------------------------------------------------------------|----------------------------------------------------------------------------------------------------------------------------------------------------------------------------------------------------------------------------------------------------------------------------------------------------------------------------------------------------------------------------------------------------------|
| (i) Determine what roles mothers with cancer assume and how cancer impacts role functioning                     | <p>What roles do you experience and what are the accompanying role demands?</p> <p>Which roles do you feel are particularly demanding? How do you prioritize your role demands?</p> <p>How do you feel cancer has impacted your ability to meet your role demands?</p>                                                                                                                                   |
| (ii) Identify how mothers' perceived ability to cope with role demands impacts psychosocial functioning and QoL | <p>What strategies have you used to cope when you are struggling?</p> <p>Do you practice self care? If so, what activities do you do and how often?</p> <p>What motivates you to meet your role demands when you are struggling?</p> <p>What goes into making a good QoL? How would you describe your current QoL? How do your role demands fit into the ways in which cancer has affected your QoL?</p> |
| (iii) Explore how the social context surrounding disability and womanhood impact role functioning               | <p>What expectations do you feel the people in your life have for you in terms of your role demands?</p> <p>How do you feel people in your life treat you if you are not able to meet your role demands?</p> <p>How do you feel people treat you when you go above and beyond your role demands?</p> <p>Do you ever feel pressure to "do-it-all" and does this impact your sense-of-self?</p>            |

*Note.* Participants will be given the definition of role demands at the beginning of interviews: role demands are similar to role stressors, in that role demands are the requirements associated with the roles you occupy. One person can occupy many roles, such as being a mother, an employee, a wife, or in cancer treatment, and all of these roles interact and influence each other.
