# Supplementary material for: Mothers with Cancer: An Intersectional Mixed-Methods Study Investigating Role Demands and Perceived Coping Abilities
Source: MDPI journal article supplement (doi:10.3390/cancers15061915), 2023-03-22
Supplement: s1 [file s1]

**Supplement Table S2.** Overview of focus group transcript analysis.

| Phase                                                                           | Coding method                                                   | Performed by                               |
|---------------------------------------------------------------------------------|-----------------------------------------------------------------|--------------------------------------------|
| 1. Researchers familiarizing themselves with the data                           |                                                                 | A.S., volunteer 1, volunteer 2             |
| 2. Generating initial codes                                                     | Inductive approach                                              | A.S., volunteer 1, volunteer 2             |
| Iterative process                                                               | Consensus-based codebook                                        | A.S., volunteer 1, volunteer 2             |
| Review                                                                          | Consensus-based codebook                                        | A.S., volunteer 1, volunteer 2, S.B.       |
| Data saturation                                                                 | Final codebook                                                  | A.S., volunteer 1, volunteer 2             |
| 3. Searching for themes                                                         | Consensus approach based on emergent themes                     | A.S., volunteer 1, volunteer 2             |
| 4. Reviewing themes                                                             | Consensus approach based on previously defined interview themes | A.S., volunteer 1, volunteer 2, S.B.       |
| 5. Defining themes                                                              | Consensus approach based on emergent themes and literature      | A.S., volunteer 1, volunteer 2, S.B.,      |
| 6. Producing a report                                                           |                                                                 | A.S., volunteer 1, volunteer 2, S.B., J.D. |
| <i>Note.</i> Coding was conducted according to a-priori content using a liberal |                                                                 |                                            |
